# Supplementary material
Source: publisher figshare collection journal article supplement (https://sage.figshare.com/ndownloader/files/14144903)
Supplement: Supplementary file 1 [file 14144903]

## Supplemental Material

Items appearing in the supplement:

1. Table S1. Clinical and Demographic Characteristics.
2. Table S2. Model 1: CFA One Factor Solution.
3. Table S3. Model 2: CFA Six Factor Oblique Solution.
4. Table S4. Model 3: Bifactor Solution - 1 General Factor 2 Specific Factors.
5. Table S5. Model 4: Bifactor Solution - 1 General Factor 3 Specific Factors.
6. Additional Bifactor Indices.
7. Table S6. Variance in Unit-Weighted Subscale Scores.
8. Table S7. Additional Validity Analyses: Associations with Interpersonal Problems in the Community Sample Controlling for the Four Remaining Domains of the FFM.
9. Table S8. Correlations between Components of Neuroticism and Anxiety in the Pittsburgh Subgroup (n=59) of the Depression Sample.
10. Table S9. Criterion Validity: Associations with Interpersonal Problems in the Pittsburgh Subgroup (N=59) of the Depression Sample.
11. Circumplex Analyses.
12. Table S10. Structural Summary Model Results of Associations with the Inventory of Interpersonal Problems Circumplex Scales in the Community Sample.
13. Figure S1: Coordinate Plots of the Association between each Component of the Bifactor Model and Circumplex Scales of the Inventory of Interpersonal Problems.

Table S1. Clinical and Demographic Characteristics.

| Variable                             | Depression Sample |                | Community Sample |               |
|--------------------------------------|-------------------|----------------|------------------|---------------|
|                                      | N                 | Mean (SD) / %  | N                | Mean (SD) / % |
| Age                                  | 805               | 40.35 (11.38)  | 1284             | 44.64 (6.75)  |
| Neuroticism - Total Score            | 807               | 119.55 (23.73) | 1284             | 74.32 (23.22) |
| Neuroticism - Facet Scores           |                   |                |                  |               |
| Anxiety                              | 807               | 21.53 (5.20)   | 1284             | 12.99 (5.26)  |
| Angry hostility                      | 807               | 17.65 (5.57)   | 1284             | 11.62 (5.21)  |
| Depression                           | 807               | 23.77 (5.33)   | 1284             | 11.54 (5.77)  |
| Self-consciousness                   | 807               | 19.99 (5.49)   | 1284             | 13.97 (4.87)  |
| Impulsiveness                        | 807               | 18.70 (5.10)   | 1284             | 15.18 (4.56)  |
| Vulnerability                        | 807               | 17.90 (5.41)   | 1284             | 9.02 (4.17)   |
| Depression symptoms                  |                   |                |                  |               |
| Hamilton Rating Scale for Depression | 732               | 18.67 (6.54)   | -                | -             |
| Beck Depression Inventory            | -                 | -              | 1276             | 4.03 (4.76)   |
| Anxiety symptoms                     |                   |                |                  |               |
| Hamilton Rating Scale for Anxiety    | 59                | 21.93 (8.30)   | -                | -             |
| SCID - Anxiety Symptom Count         | 658               | 6.28 (7.02)    | -                | -             |
| Female                               | 807               | 62.21%         | 1284             | 52.73%        |
| Married                              | 791               | 37.42%         | 1284             | 64.56%        |
| Post-secondary school education      | 767               | 76.14%         | 1284             | 86.92%        |
| Any Axis-I Diagnosis                 | 807               | 100.00%        | 1284             | 20.02%        |
| Depressive-spectrum disorder         | 807               | 100.00%        | 1284             | 1.40%         |
| Major depressive disorder            | 807               | 97.03%         | 1284             | 0.93%         |
| Dysthymic Disorder                   | 807               | 2.60%          | 1284             | 0.31%         |

|                         |     |       |      |       |
|-------------------------|-----|-------|------|-------|
| Depressive disorder NOS | 807 | 0.37% | 1284 | 0.16% |
|-------------------------|-----|-------|------|-------|

---

Note. SCID = Structured Clinical Interview for DSM-IV Diagnoses, NOS = Not otherwise specified. Ns vary due to missing data.

Table S2. Model 1: CFA One Factor Solution

| Neo-PI-R Item# | Original Facet  | Sample      |             |
|----------------|-----------------|-------------|-------------|
|                |                 | Depression  | Community   |
| 001            | Anxiety         | <b>0.39</b> | <b>0.36</b> |
| 031            | Anxiety         | <b>0.52</b> | <b>0.47</b> |
| 061            | Anxiety         | <b>0.67</b> | <b>0.67</b> |
| 091            | Anxiety         | <b>0.62</b> | <b>0.72</b> |
| 121            | Anxiety         | <b>0.47</b> | <b>0.55</b> |
| 151            | Anxiety         | <b>0.63</b> | <b>0.65</b> |
| 181            | Anxiety         | <b>0.52</b> | <b>0.48</b> |
| 211            | Anxiety         | <b>0.49</b> | <b>0.58</b> |
| 006            | Angry Hostility | <b>0.55</b> | <b>0.56</b> |
| 036            | Angry Hostility | <b>0.53</b> | <b>0.56</b> |
| 066            | Angry Hostility | <b>0.37</b> | <b>0.48</b> |
| 096            | Angry Hostility | <b>0.43</b> | <b>0.51</b> |
| 126            | Angry Hostility | <b>0.40</b> | <b>0.49</b> |
| 156            | Angry Hostility | <b>0.46</b> | <b>0.49</b> |
| 186            | Angry Hostility | <b>0.50</b> | <b>0.54</b> |
| 216            | Angry Hostility | <b>0.59</b> | <b>0.56</b> |
| 011            | Depression      | <b>0.52</b> | <b>0.64</b> |
| 041            | Depression      | <b>0.70</b> | <b>0.74</b> |
| 071            | Depression      | <b>0.57</b> | <b>0.70</b> |
| 101            | Depression      | <b>0.53</b> | <b>0.47</b> |
| 131            | Depression      | <b>0.54</b> | <b>0.51</b> |
| 161            | Depression      | <b>0.72</b> | <b>0.72</b> |

|     |                    |             |             |
|-----|--------------------|-------------|-------------|
| 191 | Depression         | <b>0.69</b> | <b>0.75</b> |
| 221 | Depression         | <b>0.71</b> | <b>0.75</b> |
| 016 | Self-consciousness | <b>0.55</b> | <b>0.43</b> |
| 046 | Self-consciousness | <b>0.53</b> | <b>0.46</b> |
| 076 | Self-consciousness | <b>0.56</b> | <b>0.63</b> |
| 106 | Self-consciousness | <b>0.40</b> | <b>0.34</b> |
| 136 | Self-consciousness | <b>0.66</b> | <b>0.73</b> |
| 166 | Self-consciousness | <b>0.53</b> | <b>0.50</b> |
| 196 | Self-consciousness | <b>0.48</b> | <b>0.45</b> |
| 226 | Self-consciousness | 0.28        | 0.17        |
| 021 | Impulsiveness      | <b>0.32</b> | <b>0.31</b> |
| 051 | Impulsiveness      | <b>0.39</b> | <b>0.46</b> |
| 081 | Impulsiveness      | 0.16        | 0.19        |
| 111 | Impulsiveness      | 0.25        | 0.30        |
| 141 | Impulsiveness      | 0.28        | 0.26        |
| 171 | Impulsiveness      | 0.22        | <b>0.42</b> |
| 201 | Impulsiveness      | <b>0.39</b> | <b>0.52</b> |
| 231 | Impulsiveness      | <b>0.47</b> | <b>0.46</b> |
| 026 | Vulnerability      | <b>0.60</b> | <b>0.64</b> |
| 056 | Vulnerability      | <b>0.65</b> | <b>0.61</b> |
| 086 | Vulnerability      | <b>0.59</b> | <b>0.66</b> |
| 116 | Vulnerability      | <b>0.35</b> | <b>0.50</b> |
| 146 | Vulnerability      | <b>0.52</b> | <b>0.55</b> |
| 176 | Vulnerability      | <b>0.43</b> | <b>0.59</b> |
| 206 | Vulnerability      | <b>0.50</b> | <b>0.60</b> |

236

Vulnerability

**0.70**

**0.67**

---

Note. Loadings > |0.30| are bolded.

Table S3. Model 2: CFA Six Factor Oblique Solution

| NEO PI-R          |       |             |             |             |             |    |                  |             |      |    |             |    |    |
|-------------------|-------|-------------|-------------|-------------|-------------|----|------------------|-------------|------|----|-------------|----|----|
| Item#             | Facet | A.          | A.H.        | D.          | S.C.        | I. | V.               | A.          | A.H. | D. | S.C.        | I. | V. |
| Depression Sample |       |             |             |             |             |    | Community Sample |             |      |    |             |    |    |
| 001               | A.    | <b>0.45</b> |             |             |             |    |                  | <b>0.41</b> |      |    |             |    |    |
| 031               | A.    | <b>0.60</b> |             |             |             |    |                  | <b>0.53</b> |      |    |             |    |    |
| 061               | A.    | <b>0.76</b> |             |             |             |    |                  | <b>0.75</b> |      |    |             |    |    |
| 091               | A.    | <b>0.69</b> |             |             |             |    |                  | <b>0.80</b> |      |    |             |    |    |
| 121               | A.    | <b>0.54</b> |             |             |             |    |                  | <b>0.62</b> |      |    |             |    |    |
| 151               | A.    | <b>0.72</b> |             |             |             |    |                  | <b>0.73</b> |      |    |             |    |    |
| 181               | A.    | <b>0.60</b> |             |             |             |    |                  | <b>0.54</b> |      |    |             |    |    |
| 211               | A.    | <b>0.56</b> |             |             |             |    |                  | <b>0.65</b> |      |    |             |    |    |
| 006               | A.H.  |             | <b>0.72</b> |             |             |    |                  | <b>0.68</b> |      |    |             |    |    |
| 036               | A.H.  |             | <b>0.71</b> |             |             |    |                  | <b>0.70</b> |      |    |             |    |    |
| 066               | A.H.  |             | <b>0.54</b> |             |             |    |                  | <b>0.61</b> |      |    |             |    |    |
| 096               | A.H.  |             | <b>0.56</b> |             |             |    |                  | <b>0.63</b> |      |    |             |    |    |
| 126               | A.H.  |             | <b>0.52</b> |             |             |    |                  | <b>0.59</b> |      |    |             |    |    |
| 156               | A.H.  |             | <b>0.62</b> |             |             |    |                  | <b>0.62</b> |      |    |             |    |    |
| 186               | A.H.  |             | <b>0.63</b> |             |             |    |                  | <b>0.65</b> |      |    |             |    |    |
| 216               | A.H.  |             | <b>0.75</b> |             |             |    |                  | <b>0.69</b> |      |    |             |    |    |
| 011               | D.    |             |             | <b>0.57</b> |             |    |                  | <b>0.67</b> |      |    |             |    |    |
| 041               | D.    |             |             | <b>0.75</b> |             |    |                  | <b>0.77</b> |      |    |             |    |    |
| 071               | D.    |             |             | <b>0.62</b> |             |    |                  | <b>0.73</b> |      |    |             |    |    |
| 101               | D.    |             |             | <b>0.58</b> |             |    |                  | <b>0.50</b> |      |    |             |    |    |
| 131               | D.    |             |             | <b>0.59</b> |             |    |                  | <b>0.53</b> |      |    |             |    |    |
| 161               | D.    |             |             | <b>0.78</b> |             |    |                  | <b>0.76</b> |      |    |             |    |    |
| 191               | D.    |             |             | <b>0.75</b> |             |    |                  | <b>0.79</b> |      |    |             |    |    |
| 221               | D.    |             |             | <b>0.76</b> |             |    |                  | <b>0.79</b> |      |    |             |    |    |
| 016               | S.C.  |             |             |             | <b>0.63</b> |    |                  |             |      |    | <b>0.49</b> |    |    |

|     |      |             |             |
|-----|------|-------------|-------------|
| 046 | S.C. | <b>0.61</b> | <b>0.52</b> |
| 076 | S.C. | <b>0.64</b> | <b>0.71</b> |
| 106 | S.C. | <b>0.46</b> | <b>0.39</b> |
| 136 | S.C. | <b>0.76</b> | <b>0.82</b> |
| 166 | S.C. | <b>0.60</b> | <b>0.56</b> |
| 196 | S.C. | <b>0.55</b> | <b>0.51</b> |
| 226 | S.C. | <b>0.33</b> | 0.21        |
| 021 | I.   | <b>0.58</b> | <b>0.47</b> |
| 051 | I.   | <b>0.67</b> | <b>0.67</b> |
| 081 | I.   | 0.28        | 0.27        |
| 111 | I.   | <b>0.46</b> | <b>0.45</b> |
| 141 | I.   | <b>0.50</b> | <b>0.40</b> |
| 171 | I.   | <b>0.42</b> | <b>0.59</b> |
| 201 | I.   | <b>0.63</b> | <b>0.73</b> |
| 231 | I.   | <b>0.71</b> | <b>0.64</b> |
| 026 | V.   | <b>0.66</b> | <b>0.70</b> |
| 056 | V.   | <b>0.72</b> | <b>0.67</b> |
| 086 | V.   | <b>0.65</b> | <b>0.73</b> |
| 116 | V.   | <b>0.40</b> | <b>0.56</b> |
| 146 | V.   | <b>0.58</b> | <b>0.61</b> |
| 176 | V.   | <b>0.49</b> | <b>0.66</b> |
| 206 | V.   | <b>0.56</b> | <b>0.67</b> |
| 236 | V.   | <b>0.78</b> | <b>0.74</b> |

---

Note. N.A.=Negative Affectivity, A.=Anxiety, A.H.=Angry Hostility, D.=Depression, S.C.=Self-Consciousness, I.=Impulsiveness, V.=Vulnerability. Loadings > |0.30| are bolded.



Table S4. Model 3: Bifactor Solution - 1 General Factor 2 Specific Factors

| NEO PI-R          |       | General     |             |                  | Specific    |             |             |
|-------------------|-------|-------------|-------------|------------------|-------------|-------------|-------------|
| Item#             | Facet | N.A.        | E.V.        | Vol.             | N.A.        | E.V.        | Vol.        |
| Depression Sample |       |             |             | Community Sample |             |             |             |
| 001               | A.    | <b>0.41</b> | -0.04       |                  | <b>0.35</b> | 0.12        |             |
| 031               | A.    | <b>0.56</b> | -0.17       |                  | <b>0.43</b> | <b>0.36</b> |             |
| 061               | A.    | <b>0.69</b> | -0.03       |                  | <b>0.67</b> | 0.12        |             |
| 091               | A.    | <b>0.64</b> | -0.03       |                  | <b>0.73</b> | 0.06        |             |
| 121               | A.    | <b>0.47</b> | 0.15        |                  | <b>0.56</b> | 0.04        |             |
| 151               | A.    | <b>0.64</b> | 0.07        |                  | <b>0.66</b> | 0.07        |             |
| 181               | A.    | <b>0.55</b> | -0.08       |                  | <b>0.45</b> | 0.29        |             |
| 211               | A.    | <b>0.50</b> | 0.04        |                  | <b>0.60</b> | -0.01       |             |
| 006               | A.H.  | <b>0.49</b> |             | <b>0.40</b>      | <b>0.53</b> |             | 0.25        |
| 036               | A.H.  | <b>0.40</b> |             | <b>0.59</b>      | <b>0.43</b> |             | <b>0.64</b> |
| 066               | A.H.  | 0.20        |             | <b>0.67</b>      | <b>0.34</b> |             | <b>0.68</b> |
| 096               | A.H.  | <b>0.33</b> |             | <b>0.44</b>      | <b>0.45</b> |             | <b>0.41</b> |
| 126               | A.H.  | <b>0.34</b> |             | <b>0.31</b>      | <b>0.46</b> |             | 0.25        |
| 156               | A.H.  | <b>0.33</b> |             | <b>0.55</b>      | <b>0.38</b> |             | <b>0.60</b> |
| 186               | A.H.  | <b>0.48</b> |             | 0.17             | <b>0.53</b> |             | 0.15        |
| 216               | A.H.  | <b>0.55</b> |             | 0.26             | <b>0.52</b> |             | <b>0.33</b> |
| 011               | D.    | <b>0.51</b> | 0.21        |                  | <b>0.67</b> | -0.18       |             |
| 041               | D.    | <b>0.65</b> | <b>0.41</b> |                  | <b>0.77</b> | -0.14       |             |
| 071               | D.    | <b>0.55</b> | 0.26        |                  | <b>0.73</b> | -0.16       |             |
| 101               | D.    | <b>0.51</b> | 0.27        |                  | <b>0.50</b> | -0.11       |             |
| 131               | D.    | <b>0.51</b> | <b>0.33</b> |                  | <b>0.52</b> | 0.02        |             |

|     |      |             |              |             |             |
|-----|------|-------------|--------------|-------------|-------------|
| 161 | D.   | <b>0.69</b> | <b>0.35</b>  | <b>0.73</b> | 0.07        |
| 191 | D.   | <b>0.67</b> | 0.29         | <b>0.78</b> | -0.15       |
| 221 | D.   | <b>0.71</b> | 0.11         | <b>0.76</b> | 0.09        |
| 016 | S.C. | <b>0.54</b> | 0.17         | <b>0.43</b> | 0.11        |
| 046 | S.C. | <b>0.53</b> | 0.16         | <b>0.46</b> | 0.13        |
| 076 | S.C. | <b>0.54</b> | 0.25         | <b>0.66</b> | -0.06       |
| 106 | S.C. | <b>0.40</b> | 0.10         | <b>0.32</b> | 0.21        |
| 136 | S.C. | <b>0.63</b> | <b>0.32</b>  | <b>0.73</b> | 0.12        |
| 166 | S.C. | <b>0.55</b> | -0.07        | <b>0.48</b> | 0.22        |
| 196 | S.C. | <b>0.47</b> | 0.17         | <b>0.44</b> | 0.13        |
| 226 | S.C. | 0.27        | 0.21         | 0.17        | 0.07        |
| 021 | I.   | 0.21        | <b>0.52</b>  | 0.25        | <b>0.37</b> |
| 051 | I.   | 0.28        | <b>0.51</b>  | <b>0.41</b> | <b>0.35</b> |
| 081 | I.   | 0.12        | 0.20         | 0.18        | 0.09        |
| 111 | I.   | 0.15        | <b>0.43</b>  | 0.25        | <b>0.31</b> |
| 141 | I.   | 0.17        | <b>0.48</b>  | 0.20        | <b>0.33</b> |
| 171 | I.   | 0.14        | <b>0.40</b>  | <b>0.40</b> | 0.18        |
| 201 | I.   | <b>0.32</b> | <b>0.38</b>  | <b>0.49</b> | 0.28        |
| 231 | I.   | <b>0.42</b> | <b>0.34</b>  | <b>0.39</b> | <b>0.44</b> |
| 026 | V.   | <b>0.61</b> | 0.01         | <b>0.63</b> | 0.16        |
| 056 | V.   | <b>0.67</b> | -0.01        | <b>0.59</b> | 0.19        |
| 086 | V.   | <b>0.60</b> | 0.06         | <b>0.66</b> | 0.12        |
| 116 | V.   | <b>0.41</b> | <b>-0.63</b> | <b>0.38</b> | <b>0.65</b> |
| 146 | V.   | <b>0.54</b> | 0.02         | <b>0.54</b> | 0.21        |
| 176 | V.   | <b>0.50</b> | <b>-0.57</b> | <b>0.47</b> | <b>0.76</b> |
| 206 | V.   | <b>0.54</b> | -0.13        | <b>0.57</b> | <b>0.32</b> |

236      V.      **0.72**      0.02                      **0.66**      0.12

---

Note. N.A.=Negative Affectivity, E.V. = Emotional Vulnerability, Vol. = Volatility, A.=Anxiety, A.H.=Angry Hostility, D.=Depression, S.C.=Self-Consciousness, I.=Impulsiveness, V.=Vulnerability. Values represent loadings from an orthogonal bifactor model. Loadings > |0.30| are bolded.

Table S5. Model 4: Bifactor Solution - 1 General Factor 3 Specific Factors

| NEO PI-R |       | General     |                   | Specific    |             | General     |                  | Specific    |             |
|----------|-------|-------------|-------------------|-------------|-------------|-------------|------------------|-------------|-------------|
| Item#    | Facet | N.A.        | E.V.              | Vol.        | Dep.        | N.A.        | E.V.             | Vol.        | Dep.        |
|          |       |             | Depression Sample |             |             |             | Community Sample |             |             |
| 001      | A.    | <b>0.40</b> | 0.04              |             |             | <b>0.34</b> | 0.18             |             |             |
| 031      | A.    | <b>0.53</b> | 0.16              |             |             | <b>0.41</b> | <b>0.39</b>      |             |             |
| 061      | A.    | <b>0.68</b> | 0.09              |             |             | <b>0.66</b> | 0.21             |             |             |
| 091      | A.    | <b>0.63</b> | 0.04              |             |             | <b>0.72</b> | 0.10             |             |             |
| 121      | A.    | <b>0.50</b> | -0.06             |             |             | <b>0.55</b> | 0.11             |             |             |
| 151      | A.    | <b>0.65</b> | -0.04             |             |             | <b>0.66</b> | 0.11             |             |             |
| 181      | A.    | <b>0.54</b> | 0.09              |             |             | <b>0.43</b> | <b>0.36</b>      |             |             |
| 211      | A.    | <b>0.51</b> | -0.04             |             |             | <b>0.60</b> | 0.04             |             |             |
| 006      | A.H.  | <b>0.49</b> |                   | <b>0.40</b> |             | <b>0.54</b> |                  | 0.24        |             |
| 036      | A.H.  | <b>0.40</b> |                   | <b>0.59</b> |             | <b>0.44</b> |                  | <b>0.64</b> |             |
| 066      | A.H.  | 0.20        |                   | <b>0.68</b> |             | <b>0.35</b> |                  | <b>0.68</b> |             |
| 096      | A.H.  | <b>0.33</b> |                   | <b>0.44</b> |             | <b>0.45</b> |                  | <b>0.41</b> |             |
| 126      | A.H.  | <b>0.34</b> |                   | <b>0.31</b> |             | <b>0.46</b> |                  | 0.24        |             |
| 156      | A.H.  | <b>0.33</b> |                   | <b>0.56</b> |             | <b>0.38</b> |                  | <b>0.60</b> |             |
| 186      | A.H.  | <b>0.48</b> |                   | 0.17        |             | <b>0.54</b> |                  | 0.14        |             |
| 216      | A.H.  | <b>0.56</b> |                   | 0.26        |             | <b>0.52</b> |                  | <b>0.33</b> |             |
| 011      | D.    | <b>0.48</b> |                   |             | <b>0.39</b> | <b>0.63</b> |                  |             | <b>0.44</b> |
| 041      | D.    | <b>0.65</b> |                   |             | <b>0.49</b> | <b>0.75</b> |                  |             | 0.15        |
| 071      | D.    | <b>0.53</b> |                   |             | <b>0.40</b> | <b>0.69</b> |                  |             | <b>0.52</b> |
| 101      | D.    | <b>0.54</b> |                   |             | 0.12        | <b>0.50</b> |                  |             | -0.14       |
| 131      | D.    | <b>0.53</b> |                   |             | 0.21        | <b>0.54</b> |                  |             | -0.14       |

|     |      |             |             |             |             |             |             |
|-----|------|-------------|-------------|-------------|-------------|-------------|-------------|
| 161 | D.   | <b>0.69</b> |             | <b>0.35</b> | <b>0.75</b> |             | -0.06       |
| 191 | D.   | <b>0.66</b> |             | <b>0.35</b> | <b>0.77</b> |             | 0.16        |
| 221 | D.   | <b>0.72</b> |             | 0.07        | <b>0.78</b> |             | -0.02       |
| 016 | S.C. | <b>0.58</b> | -0.15       |             | <b>0.43</b> | 0.09        |             |
| 046 | S.C. | <b>0.56</b> | -0.11       |             | <b>0.45</b> | 0.15        |             |
| 076 | S.C. | <b>0.59</b> | -0.13       |             | <b>0.67</b> | -0.07       |             |
| 106 | S.C. | <b>0.42</b> | -0.13       |             | <b>0.32</b> | 0.19        |             |
| 136 | S.C. | <b>0.69</b> | -0.09       |             | <b>0.74</b> | 0.09        |             |
| 166 | S.C. | <b>0.53</b> | 0.17        |             | <b>0.48</b> | 0.22        |             |
| 196 | S.C. | <b>0.50</b> | -0.10       |             | <b>0.44</b> | 0.11        |             |
| 226 | S.C. | <b>0.31</b> | -0.19       |             | 0.18        | 0.03        |             |
| 021 | I.   | 0.21        |             | <b>0.52</b> | 0.26        |             | <b>0.37</b> |
| 051 | I.   | 0.29        |             | <b>0.51</b> | <b>0.42</b> |             | <b>0.34</b> |
| 081 | I.   | 0.12        |             | 0.20        | 0.18        |             | 0.09        |
| 111 | I.   | 0.15        |             | <b>0.42</b> | 0.25        |             | 0.30        |
| 141 | I.   | 0.17        |             | <b>0.48</b> | 0.21        |             | <b>0.33</b> |
| 171 | I.   | 0.14        |             | <b>0.39</b> | <b>0.41</b> |             | 0.17        |
| 201 | I.   | <b>0.33</b> |             | <b>0.38</b> | <b>0.50</b> |             | 0.27        |
| 231 | I.   | <b>0.42</b> |             | <b>0.34</b> | <b>0.39</b> |             | <b>0.44</b> |
| 026 | V.   | <b>0.61</b> | 0.13        |             | <b>0.63</b> | 0.16        |             |
| 056 | V.   | <b>0.66</b> | 0.20        |             | <b>0.58</b> | 0.23        |             |
| 086 | V.   | <b>0.61</b> | 0.02        |             | <b>0.65</b> | 0.14        |             |
| 116 | V.   | 0.28        | <b>0.66</b> |             | <b>0.35</b> | <b>0.67</b> |             |
| 146 | V.   | <b>0.53</b> | 0.09        |             | <b>0.53</b> | 0.20        |             |
| 176 | V.   | <b>0.37</b> | <b>0.78</b> |             | <b>0.44</b> | <b>0.78</b> |             |
| 206 | V.   | <b>0.50</b> | 0.30        |             | <b>0.55</b> | <b>0.34</b> |             |

236      V.      **0.71**      0.16                      **0.66**      0.16

---

Note. N.A.=Negative Affectivity, E.V. = Emotional Vulnerability, Vol. = Volatility, Dep. = Depression,  
A.=Anxiety, A.H.=Angry Hostility, D.=Depression, S.C.=Self-Consciousness, I.=Impulsiveness, V.=Vulnerability.  
Values represent loadings from an orthogonal bifactor model. Loadings > |0.30| are bolded.

## **Additional Bifactor Indices**

In addition to the indices we reported in the main text that evaluated the bifactor models, another set of indices that can be calculated for bifactor model structures is the relative breakdown of the variance in unit-weighted subscale scores that is attributable to the general factor versus the variance attributable to the specific factor in question (Rodriguez, Reise, & Haviland, 2015). In the context of this study, unit-weighted subscale scores represent nothing more than the simple facet scores from the NEO-PI-R, calculated in the standard manner. In Table S6 below, we report the percentage of reliable variance in these unit-weighted subscale scores ( $\omega$ -subscale) as well as the relative contributions of the sources of variance in each score.

Overall reliability was high in both samples ( $\geq 0.77$ ). For the depression sample, a larger proportion of variance in unit-weighted scores for the Anxiety, Depression, Self-Consciousness, and Vulnerability facets originated from the influence of the general factor than from the specific factors themselves. By contrast, for the Angry hostility and Impulsiveness facets, a larger proportion of variance was attributable to individual differences on the relevant specific factors (controlling for the general factor). In the community sample, the general factor accounted for more of the reliable variance than did the specific factor in question for all of the facets with the exception of Impulsiveness. These patterns are not surprising. As described in the main text, scores on the general factor are also highly correlated with measures of depression and anxiety. The importance of using bifactor-model estimates of the specific factors (as opposed to standard unit-weighted facet scores) can most clearly be seen in the differences in the patterns of correlations between each set of scores and measures of depression and anxiety (Table 3). In the case of the bifactor model estimates, the general factor (which is orthogonal to the specific factors) captured much of the relationships with psychiatric symptoms, and the associations

between symptoms and the specific factors was markedly reduced compared to unweighted facet scores.



Table S6. Variance in Unit-Weighted Subscale Scores

| Subscale Reliabilities                       | Specific Factors  |      |      |      |      |      |
|----------------------------------------------|-------------------|------|------|------|------|------|
|                                              | A.                | A.H. | D.   | S.C. | I.   | V.   |
|                                              | Depression Sample |      |      |      |      |      |
| % of reliable variance ( $\omega$ -Subscale) | 0.83              | 0.84 | 0.87 | 0.81 | 0.77 | 0.85 |
| % of variance explained by specific factor   | 0.24              | 0.47 | 0.15 | 0.23 | 0.58 | 0.18 |
| % of variance explained by general factor    | 0.59              | 0.37 | 0.73 | 0.57 | 0.19 | 0.66 |
| % of non-reliable variance                   | 0.17              | 0.16 | 0.13 | 0.19 | 0.23 | 0.15 |
|                                              | Community Sample  |      |      |      |      |      |
| % of reliable variance ( $\omega$ -Subscale) | 0.85              | 0.85 | 0.89 | 0.79 | 0.78 | 0.87 |
| % of variance explained by specific factor   | 0.24              | 0.38 | 0.03 | 0.25 | 0.48 | 0.20 |
| % of variance explained by general factor    | 0.60              | 0.48 | 0.85 | 0.54 | 0.30 | 0.67 |
| % of non-reliable variance                   | 0.15              | 0.15 | 0.11 | 0.21 | 0.22 | 0.13 |

Note. A.=Anxiety, A.H.=Angry Hostility, D.=Depression, S.C.=Self-Consciousness, I.=Impulsiveness, V.=Vulnerability.  $\omega$ -Subscale estimates the proportion of reliable variance in the unit-weighted subscale associated with each specific factor. The percentage of variance associated with the specific and general factors sum to  $\omega$ -Subscale. The addition of the percent of non-reliable variance to  $\omega$ -Subscale sums to unity.

Table S7. Additional Validity Analyses: Associations with Interpersonal Problems in the Community Sample Controlling for the Four Remaining Domains of the FFM.

| IIP Subscales             | Symptoms | General |          |          | Specific |          |        |         | Additional FFM Domains |          |          |          |
|---------------------------|----------|---------|----------|----------|----------|----------|--------|---------|------------------------|----------|----------|----------|
|                           | Dep.     | N.A.    | A.       | A.H.     | D.       | S.C.     | I.     | V.      | O.                     | C.       | E.       | Ag.      |
| Interpersonal Sensitivity | 0.26***  | 0.40*** | 0.06     | 0.03     | -0.08*   | 0.29***  | 0.08** | -0.02   | 0.09**                 | -0.14*** | -0.13*** | 0.03     |
| Interpersonal Ambivalence | 0.11***  | 0.01    | -0.06    | 0.03     | 0.01     | 0.02     | 0.04   | 0.00    | 0.10***                | -0.10*** | -0.14*** | -0.20*** |
| Aggression                | 0.17***  | 0.25*** | -0.16*** | 0.37***  | -0.10**  | -0.15*** | 0.07*  | 0.02    | -0.05†                 | -0.07*   | 0.09**   | -0.38*** |
| Need for Approval         | 0.21***  | 0.45*** | 0.04     | -0.10*** | -0.09**  | 0.25***  | 0.05†  | -0.07*  | -0.01                  | -0.16*** | -0.05†   | 0.16***  |
| Lack of Sociability       | 0.17***  | 0.21*** | -0.03    | -0.08**  | -0.03    | 0.27***  | 0.04   | -0.07** | 0.03                   | -0.08**  | -0.52*** | 0.03     |

Note. IIP = Inventory of Interpersonal Problems, Dep. = Depression symptoms, N.A.=Negative Affectivity, A.=Anxiety, A.H.=Angry Hostility, D.=Depression, S.C.=Self-Consciousness, I.=Impulsiveness, V.=Vulnerability, FFM=Five Factor Model, O.=Openness, C.=Conscientiousness, E.=Extraversion, Ag.=Agreeableness. Values represent standardized beta estimates from structural equation models in which all of the independent variables, displayed in the columns, were examined simultaneously. Separate models were estimated for each IIP Subscale (row). †=p<0.10, \*=p<0.05, \*\*=p<.01, \*\*\*p<0.001

Table S8. Correlations between Components of Neuroticism and Anxiety in the Pittsburgh Subgroup (n=59) of the Depression Sample.

| Neuroticism Component                | Anxiety                   |
|--------------------------------------|---------------------------|
| Unit-Weighted Raw Scores             |                           |
| Total Neuroticism                    | <b>0.33 [0.08 – 0.54]</b> |
| Neuroticism Facet:                   |                           |
| Anxiety                              | <b>0.26 [0.00 – 0.48]</b> |
| Angry hostility                      | <b>0.26 [0.01 – 0.49]</b> |
| Depression                           | <b>0.30 [0.05 – 0.52]</b> |
| Self-consciousness                   | <b>0.27 [0.01 – 0.49]</b> |
| Impulsiveness                        | 0.24 [-0.01 – 0.47]       |
| Vulnerability                        | <b>0.26 [0.01 – 0.49]</b> |
| Bifactor Components                  |                           |
| General Factor: Negative Affectivity | <b>0.33 [0.09 – 0.54]</b> |
| Specific Factor:                     |                           |
| Anxiety                              | -0.02 [-0.27 – 0.24]      |
| Angry hostility                      | 0.09 [-0.17 – 0.34]       |
| Depression                           | 0.11 [-0.15 – 0.36]       |
| Self-consciousness                   | 0.08 [-0.18 – 0.33]       |
| Impulsiveness                        | 0.09 [-0.17 – 0.34]       |
| Vulnerability                        | 0.16 [-0.10 – 0.40]       |

Note. Values represent correlation coefficients and 95% confidence intervals. Anxiety was assessed using the HRSA (Hamilton Rating Scale for Anxiety). Bolded values are statistically significant at  $p < 0.05$ .

Table S9. Criterion Validity: Associations with Interpersonal Problems in the Pittsburgh Subgroup (N=59) of the Depression Sample.

| IIP Subscales             | Symptoms |        | General |      |         | Specific |         |       |       |
|---------------------------|----------|--------|---------|------|---------|----------|---------|-------|-------|
|                           | Dep.     | Anx.   | N.A.    | A.   | A.H.    | D.       | S.C.    | I.    | V.    |
| Interpersonal Sensitivity | -0.03    | 0.08   | 0.52*** | 0.03 | 0.42*** | -0.02    | 0.33*** | 0.18† | -0.08 |
| Interpersonal Ambivalence | 0.21     | 0.02   | 0.43**  | 0.00 | 0.20†   | 0.04     | 0.19†   | 0.20† | -0.08 |
| Aggression                | -0.23†   | 0.44** | 0.25*   | 0.04 | 0.60*** | -0.16    | 0.09    | 0.12  | -0.13 |
| Need for Approval         | 0.14     | 0.08   | 0.57*** | 0.05 | 0.06    | -0.09    | 0.26*   | 0.00  | -0.08 |
| Lack of Sociability       | 0.06     | 0.00   | 0.51*** | 0.10 | 0.07    | -0.05    | 0.36**  | 0.12  | -0.03 |

Note. IIP = Inventory of Interpersonal Problems, Dep. = Depression symptoms, Anx. = Anxiety symptoms, N.A.=Negative Affectivity, A.=Anxiety, A.H.=Angry Hostility, D.=Depression, S.C.=Self-Consciousness, I.=Impulsiveness, V.=Vulnerability. Values represent standardized beta estimates from multiple regression models in which all of the independent variables, displayed in the columns, were entered simultaneously. Given the sample size, regression models were calculated using factor score estimates. †=p<0.10, \*=p<0.05, \*\*=p<.01,\*\*\*p<0.001

## **Circumplex Analyses**

Secondary analyses examined the interpersonal circumplex scales from the IIP. The circumplex scales (Alden, Wiggins, & Pincus, 1990) are based in interpersonal theory, which uses a circumplex representation to organize interpersonal functioning problems around two primary, orthogonal domains: agency and communion (Wiggins, 1991). The eight octants represented in this circular structure and measured by the IIP-Circumplex scales, are:

*Domineering, Vindictive, Cold, Avoidant, Nonassertive, Exploitable, Overly-Nurturant, and Intrusive.*

To examine the relationship between the elements of the bifactor structure of neuroticism and the circumplex scales of the IIP, we used the structural summary modeling (SSM) approach with bootstrap-resampling estimated confidence intervals (Zimmermann & Wright, 2017). The SSM approach estimates the goodness-of-fit of the observed profile of correlations between the IIP octant scales and an external variable (e.g., neuroticism) to the expected pattern of correlations based on circumplex structure (i.e., a sine wave) and yields three critical parameter values that summarize the interpersonal profile of a construct: *elevation*, which represents the average correlation between the construct of interest and the eight octant scales; *amplitude*, which captures the degree to which a differentiated peak is observed in the profile ; and *angular displacement*, which represents the location of the peak in circumplex space and can be used to characterize the interpersonal problem theme of the construct of interest. Given the small number of individuals who completed this measure in the depression sample (n=59), and given the sample requirements for using the structural summary approach (Zimmermann & Wright, 2017), these analyses focus on data from the community sample.

The results of the circumplex analyses are presented in Table S10 and in the

Supplemental Figure. Several aspects of these results are notable. First, the goodness-of-fit estimate for the relationship between the interpersonal circumplex configuration and general Negative Affectivity factor was low (i.e.,  $< .7$ ), suggesting the possibility of an undifferentiated pattern of interpersonal problems associated with the general factor. This possibility was further supported by the observation that the Elevation of the pattern associated with the general factor was high, whereas the amplitude was low. This indicates that the correlations between the general factor and each of the octant scales is high and relatively flat, with no notable peak in any one octant. By contrast, the two specific factors (Angry Hostility and Self-Consciousness) that demonstrated incremental associations with the IIP factor scores also displayed relatively high amplitudes ( $> .2$ ), reflecting more pronounced peaks in their profiles. For the Angry Hostility factor, the profile peaked in the Vindictive octant, whereas Self-Consciousness was associated with a profile that peaked in the Nonassertive octant. Also notable was that the elevation of the Self-Consciousness profile was higher than that observed for any of the other specific factors, suggesting greater general difficulties in interpersonal functioning compared to the other specific factors, with particularly pronounced problems associated with the Nonassertive octant. Comparison of the patterns associated with Angry Hostility and Self-Consciousness suggests that these two specific factors represent interpersonal problems at opposite ends of the dominance domain.

Table S10. Structural Summary Model Results of Associations with the Inventory of Interpersonal Problems Circumplex Scales in the Community Sample.

| Bifactor Index                       | Goodness-of-fit | Elevation           | Amplitude        | Angular Displacement   |
|--------------------------------------|-----------------|---------------------|------------------|------------------------|
| General Factor: Negative Affectivity | 0.68            | 0.31 [0.28–0.33]    | 0.06 [0.03–0.09] | 241.75 [205.96–281.04] |
| Specific Factors                     |                 |                     |                  |                        |
| Anxiety                              | 0.97            | 0.02 [-0.02–0.05]   | 0.09 [0.05–0.13] | 323.78 [298.44–350.24] |
| Angry Hostility                      | 0.94            | -0.04 [-0.07–-0.01] | 0.27 [0.23–0.30] | 112.87 [105.61–120.49] |
| Depression                           | 0.75            | -0.02 [-0.05–0.01]  | 0.07 [0.04–0.11] | 142.99 [112.28–170.59] |
| Self-consciousness                   | 0.98            | 0.10 [0.07–0.13]    | 0.21 [0.18–0.25] | 277.18 [267.40–286.30] |
| Impulsiveness                        | 0.87            | 0.04 [0.01–0.08]    | 0.09 [0.06–0.13] | 54.14 [30.67–77.73]    |
| Vulnerability                        | 0.54            | 0.03 [-0.01–0.06]   | 0.06 [0.02–0.09] | 248.27 [206.47–287.29] |

Note. Brackets represent bootstrap estimated 95% confidence intervals.

Figure S1

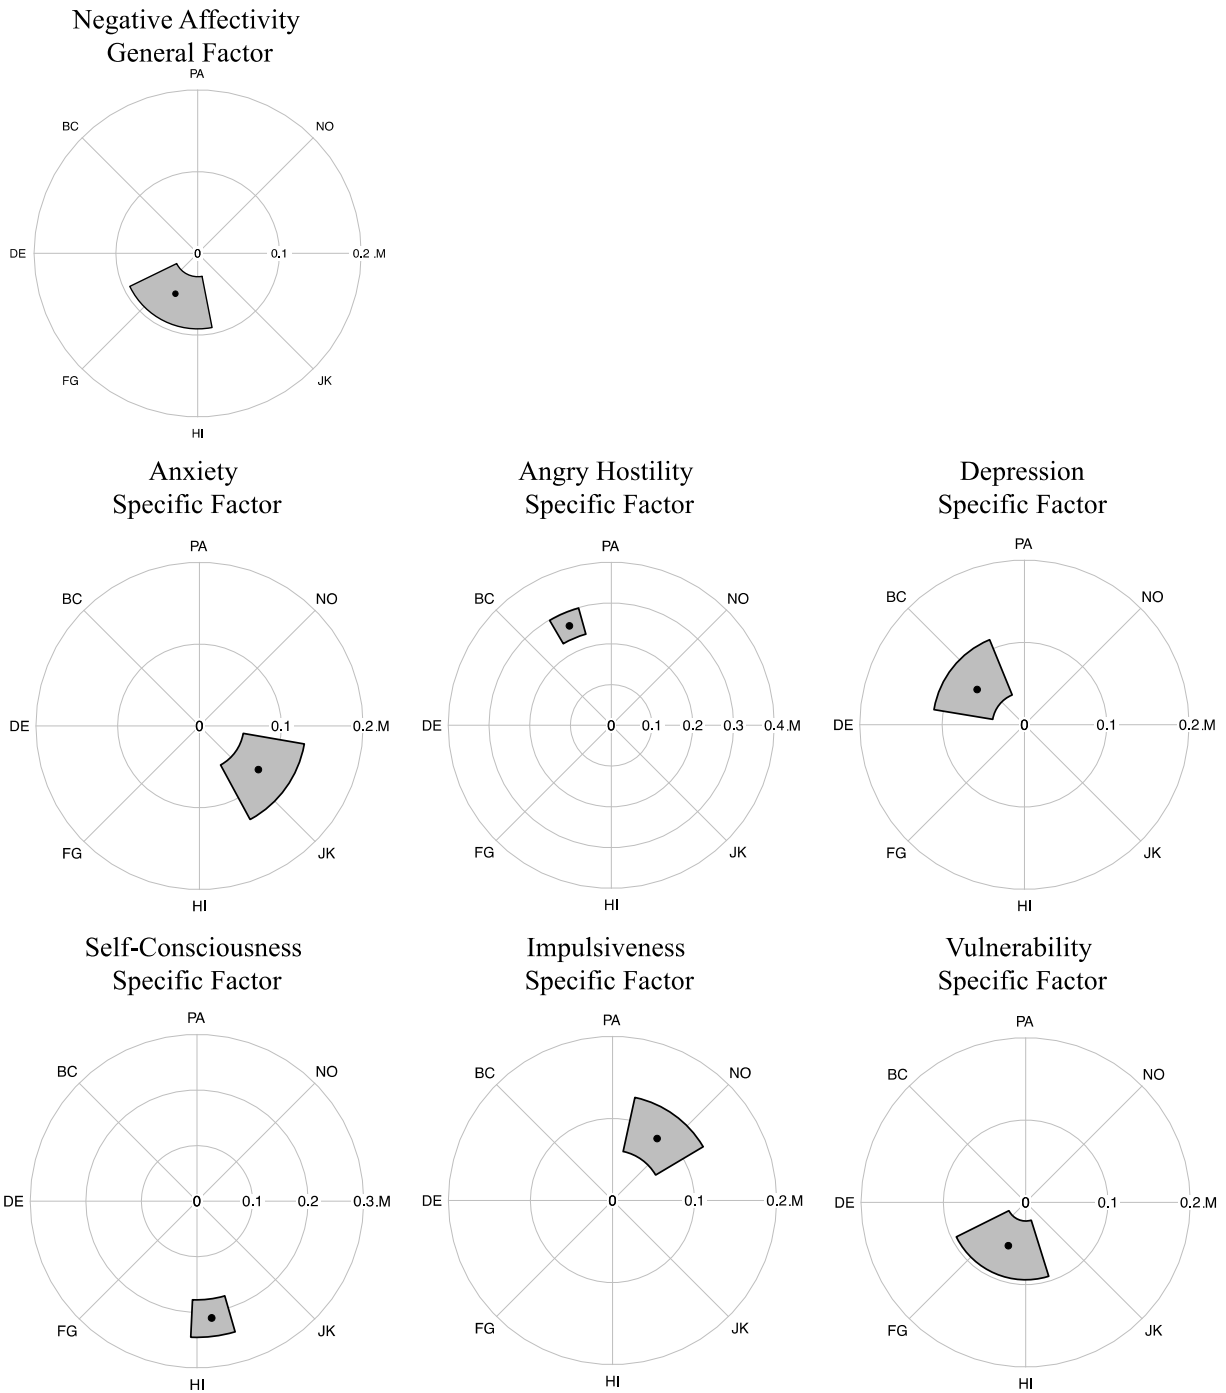

Supplemental Figure: Coordinate Plots of the Association between each Component of the Bifactor Model and Circumplex Scales of the Inventory of Interpersonal Problems. Solid dots represent the point-estimate for the location of the association with the construct of interest in circumplex space. Shaded regions represent boot-strap estimated 95% confidence intervals. The octants are defined as follows: PA: Domineering, BC: Vindictive, DE: Cold, FG: Avoidant, HI: Nonassertive, JK: Exploitable, LM: Overly-Nurturant, and NO: Intrusive.



## References

- Alden, L. E., Wiggins, J. S., & Pincus, A. L. (1990). Construction of circumplex scales for the Inventory of Interpersonal Problems. *Journal of Personality Assessment*, *55*(3-4), 521-536. doi:10.1080/00223891.1990.9674088
- Rodriguez, A., Reise, S. P., & Haviland, M. G. (2015). Evaluating bifactor models: Calculating and interpreting statistical indices. *Psychological Methods*, *21*(2), 137-150. doi:10.1037/met0000045
- Wiggins, J. S. (1991). Agency and communion as conceptual coordinates for the understanding and measurement of interpersonal behavior. In D. Cicchetti & W. M. Grove (Eds.), *Thinking Clearly about Psychology: Essays in Honor of Paul E. Meehl* (pp. 89-113). Minneapolis, MN: University of Minnesota Press.
- Zimmermann, J., & Wright, A. G. C. (2017). Beyond description in interpersonal construct validation. *Assessment*, *24*(1), 3-23. doi:10.1177/1073191115621795
